# FGF23 protects osteoblasts from dexamethasone-induced oxidative injury

Feng Ji<sup>1</sup>, Xiaohui Hu<sup>1</sup>, Wenhao Hu<sup>1</sup>, Yue-Dong Hao<sup>1</sup>

<sup>1</sup>Department of Orthopedics, The Affiliated Huaian No.1 People's Hospital of Nanjing Medical University, Huaian, China

**Correspondence to:** Yue-Dong Hao; email: [hayyhyd@njmu.edu.cn](mailto:hayyhyd@njmu.edu.cn)

**Keywords:** FGF23, FGFR1, osteoblasts, dexamethasone, Akt

**Received:** December 13, 2019

**Accepted:** June 10, 2020

**Published:** October 14, 2020

**Copyright:** © 2020 Ji et al. This is an open access article distributed under the terms of the Creative Commons Attribution License (CC BY 3.0), which permits unrestricted use, distribution, and reproduction in any medium, provided the original author and source are credited.

## ABSTRACT

Dexamethasone (DEX) can exert a cytotoxic effect on cultured osteoblasts. The current study explored the potential osteoblast cytoprotective effect of fibroblast growth factor 23 (FGF23). In OB-6 human osteoblastic cells and primary murine osteoblasts, FGF23 induced phosphorylation of the receptor FGFR1 and activated the downstream Akt-S6K1 signaling. FGF23-induced FGFR1-Akt-S6K phosphorylation was largely inhibited by FGFR1 shRNA, but augmented with ectopic FGFR1 expression in OB-6 cells. FGF23 attenuated DEX-induced death and apoptosis in OB-6 cells and murine osteoblasts. Its cytoprotective effects were abolished by FGFR1 shRNA, Akt inhibition or Akt1 knockout. Conversely, forced activation of Akt inhibited DEX-induced cytotoxicity in OB-6 cells. Furthermore, FGF23 activated Akt downstream nuclear-factor-E2-related factor 2 (Nrf2) signaling to alleviate DEX-induced oxidative injury. On the contrary, Nrf2 shRNA or knockout almost reversed FGF23-induced osteoblast cytoprotection against DEX. Collectively, FGF23 activates FGFR1-Akt and Nrf2 signaling cascades to protect osteoblasts from DEX-induced oxidative injury and cell death.

## INTRODUCTION

Dexamethasone (DEX) is a medication routinely prescribed to patients with chronic inflammatory and auto-immune diseases [1]. In United States an estimated 30 million patients are currently taking DEX [2]. However studies have shown that long-term and/or excessive DEX consumption could lead to osteoporosis (or even osteonecrosis) [3–5]. Over 30% or more DEX-taking patients will suffer bone fractures [3], presenting with decreased number of osteoblasts and increased osteoblast cell apoptosis in the bones [3–5]. DEX can exert a cytotoxic effect to cultured osteoblasts [6–8]. Our group has been dedicated to exploring the pathological mechanisms of DEX-induced injury to osteoblasts/osteoblastic cells [9–15].

Fibroblast growth factor 23 (FGF23), a phosphaturic factor, is a member of the endocrine FGF19 family. It is

produced by osteoblasts in the bone [16–18]. Its known function is to promote renal phosphate wasting by suppressing expression of renal tubular sodium phosphate cotransporter type IIa (NPT2a) [16, 19]. FGF23, like other FGFs, signals through the FGF receptors (FGFRs), mainly FGFR1 [20]. FGF23-FGFR binding affinity is high [16, 19, 20], which will induce FGFR1 phosphorylation, thus recruiting multiple adaptor proteins to activate PI3K-Akt and other downstream cascades [16, 19, 20]. FGF23 can be produced by osteoblasts [21]. Studies have suggested autocrine and paracrine actions of FGF23 in osteoblasts [22]. FGF23 has been shown to promote human cancer cell survival and progression [23]. Whether FGF23 can activate FGFR1 in osteoblasts and offer cytoprotection against DEX-induced cytotoxicity have not been studied thus far.

The nuclear-factor-E2-related factor 2 (Nrf2) cascade is recognized as one of the most important endogenous

antioxidant mechanism [24–27]. Without stimulation (basal conditions), Nrf2 association with its suppressor protein and also a stress sensor Keap1, subjected to ubiquitination and proteasomal degradation by Cullin 3 E3 ubiquitin ligase [24–27]. Nrf2 activation will lead to Keap1-Nrf2 disassociation, Nrf2 protein cytosol accumulation and following nuclear translocation. It will then lead to transcription and expression of the antioxidant response element (ARE) genes, including phase 2 detoxifying enzymes and antioxidant proteins [24–27]. Expression of these genes, including *heme oxygenase-1 (HO-1)*, *NAD(P)H:quinone oxidoreductase 1 (NQO1)*, *γ-glutamyl cysteine ligase catalytic subunit (GCLC)*, and *the modifier subunit (GCLM)* [28], will provoke significant antioxidant and cytoprotective activity [29, 30]. We will show here that FGF23 activates Nrf2 signaling, lying downstream of FGFR1-Akt, thereby protecting osteoblasts from DEX-induced oxidative injury and cell death.

## RESULTS

### FGF23 activates FGFR1-Akt-S6K1 and Erk1/2 signalings in osteoblasts

In the differentiated OB-6 human osteoblastic cells, FGFR1, the main functional receptor of FGF23 (Figure 1A), is expressed. Significantly, FGF23 (25 ng/mL) robustly induced FGFR1 phosphorylation in OB-6 cells (Figure 1A). Furthermore, phosphorylation and activation of FGFR1's downstream cascades, Akt and S6K1, was detected in FGF23-stimulated OB-6 cells (Figure 1A). FGF23 induced Erk1/2 phosphorylation in OB-6 osteoblasts as well (Figure 1A).

To silence FGFR1, two lentiviral FGFR1 shRNAs, against non-overlapping sequences of FGFR1 (“shFGFR1-Seq1/Seq2”), were individually transduced to OB-6 cells. Via selection by puromycin-containing medium, the stable cells were established. Testing FGFR1 expression, we show that the applied FGFR1 shRNAs induced over 90% knockdown of FGFR1 in stable cells (Figure 1B). Importantly, FGF23-induced phosphorylation of FGFR1, Akt, S6K1 and Erk1/2 was largely inhibited by the applied FGFR1 shRNAs (Figure 1B). The applied FGFR1 shRNAs did not alter expression of EGFR (Figure 1B). On the contrary, a lentiviral FGFR1-expressing construct (“lv-FGFR1”) was transduced to OB-6 cells, leading to FGFR1 overexpression (Figure 1C). Ectopic overexpression of FGFR1 augmented FGF23-induced phosphorylation of FGFR1, Akt, S6K1 and Erk1/2 in OB-6 cells. These results further supported the functional FGFR1 expression in OB-6 cells.

In the primary murine osteoblasts, FGFR1 expression was also detected (Figure 1D). Further, FGF23

treatment induced phosphorylation of FGFR1, Akt, S6K1 and Erk1/2 in the murine osteoblasts (Figure 1D). Together, these results show that FGF23 activated FGFR1-Akt-S6K1 and Erk1/2 signalings in the osteoblasts.

### FGF23 protects osteoblasts from DEX-induced cell death and apoptosis

Next, experiments were performed to test the potential effect of FGF23 in DEX-treated osteoblasts. OB-6 cells were treated with DEX. In line with the previous findings [9, 31–33], DEX treatment (1 μM [31, 32]) induced significant cell viability (CCK-8 OD) reduction (Figure 2A) and cell death (medium LDH release, Figure 2B) in OB-6 cells, which were largely attenuated by pretreatment of FGF23 (at 5–25 ng/mL, 2h pretreatment) (Figure 2A and 2B). In OB-6 cells, DEX treatment induced apoptosis activation, which was evidenced by cleavages of caspase-3-PARP (poly (ADP-ribose) polymerase) (Figure 2C) and increased nuclear TUNEL staining (Figure 2D). The pro-apoptotic activity of DEX was significantly inhibited with FGF23 pretreatment (Figure 2C and 2D). In FGFR1-silenced OB-6 cells (by shFGFR1-Seq2, see Figure 1), FGF23 pretreatment was completely ineffective against DEX-induced cell death (Figure 2E) and apoptosis (Figure 2F). Therefore, FGFR1 activation is required for FGF23-induced osteoblast cytoprotection.

In the primary murine osteoblasts DEX treatment similarly induced viability reduction (Figure 2G), cell death (Figure 2H), and apoptosis activation (Figure 2I). FGF23 (25 ng/mL, 2h pretreatment) similarly attenuated DEX-induced cytotoxicity in murine osteoblasts (Figure 2G–2I). These results demonstrated that FGF23 pretreatment potently inhibited DEX-induced cytotoxicity in OB-6 cells and primary murine osteoblasts. FGF23 single treatment did not alter viability and apoptosis in the tested osteoblasts.

### Akt activation mediates FGF23-induced osteoblast cytoprotection against DEX

Akt is a key pro-survival factor, protecting cells against various stress stimulations [34]. To block Akt activation, the Akt inhibitor LY294002 was applied. Furthermore, the CRISPR/Cas9 gene-editing method was utilized to completely knockout (KO) Akt1 [35] in OB-6 cells (Figure 3A). As shown, LY294002 or Akt1-KO almost blocked FGF23-induced Akt phosphorylation in OB-6 cells, while leaving upstream FGFR1 expression/phosphorylation unchanged (Figure 3A). Importantly, with LY294002 or Akt1-KO, FGF23 (25 ng/mL) was unable to protect OB-6 cells from DEX-induced viability reduction (Figure 3B) and cell death

(Figure 3C). Therefore, Akt activation is required for FGF23's osteoblast cytoprotective actions. LY294002 or Akt1 knockout alone intensified DEX-induced cytotoxicity in OB-6 cells (Figure 3B and 3C), suggesting that the basal Akt activation is important for the survival of DEX-treated OB-6 cells.

Next a constitutively-active Akt1 (caAkt1, from Dr. Zhang [36]) was transduced to OB-6 cells, increasing Akt activation without FGF23 stimulation (Figure 3D). The caAkt1, as expected, did not induce FGFR1 phosphorylation (Figure 3D). In OB-6 cells the caAkt1 largely alleviated DEX-induced viability reduction (Figure 3E) and cell death (Figure 3F). Therefore, forced activation of Akt attenuated DEX-induced cytotoxicity in OB-6 cells, mimicking FGF23-induced actions. In the primary murine osteoblasts, the Akt inhibitor LY294002 almost abolished FGF23-induced anti-DEX actions (Figure 3G and 3H). Taken together, these results imply that Akt activation mediated FGF23-

induced osteoblast cytoprotection against DEX. Contrarily, Erk inhibitors, PD98059 and U0126, had no significant effect on FGF23-induced osteoblast cytoprotection against DEX (Supplementary Figure 1A and 1B).

### FGF23 inhibits DEX-induced oxidative stress in osteoblasts

Studies have shown that DEX induces reactive oxygen species (ROS) production and oxidative injury in osteoblasts, contributing to subsequent cell death and apoptosis [9, 10, 37–39]. Contrarily, inhibition of oxidative injury will efficiently protect osteoblasts from DEX [9, 10, 37–39]. The results above have shown that FGF23 alleviated DEX-induced cytotoxicity in osteoblasts, we thus tested its potential effect on DEX-induced oxidative injury. In OB-6 cells DEX treatment (1  $\mu$ M, 12h) increased superoxide level (Figure 4A), which was accompanied by lipid peroxidation (Figure 4B) and mitochondrial depolarization (JC-1 green

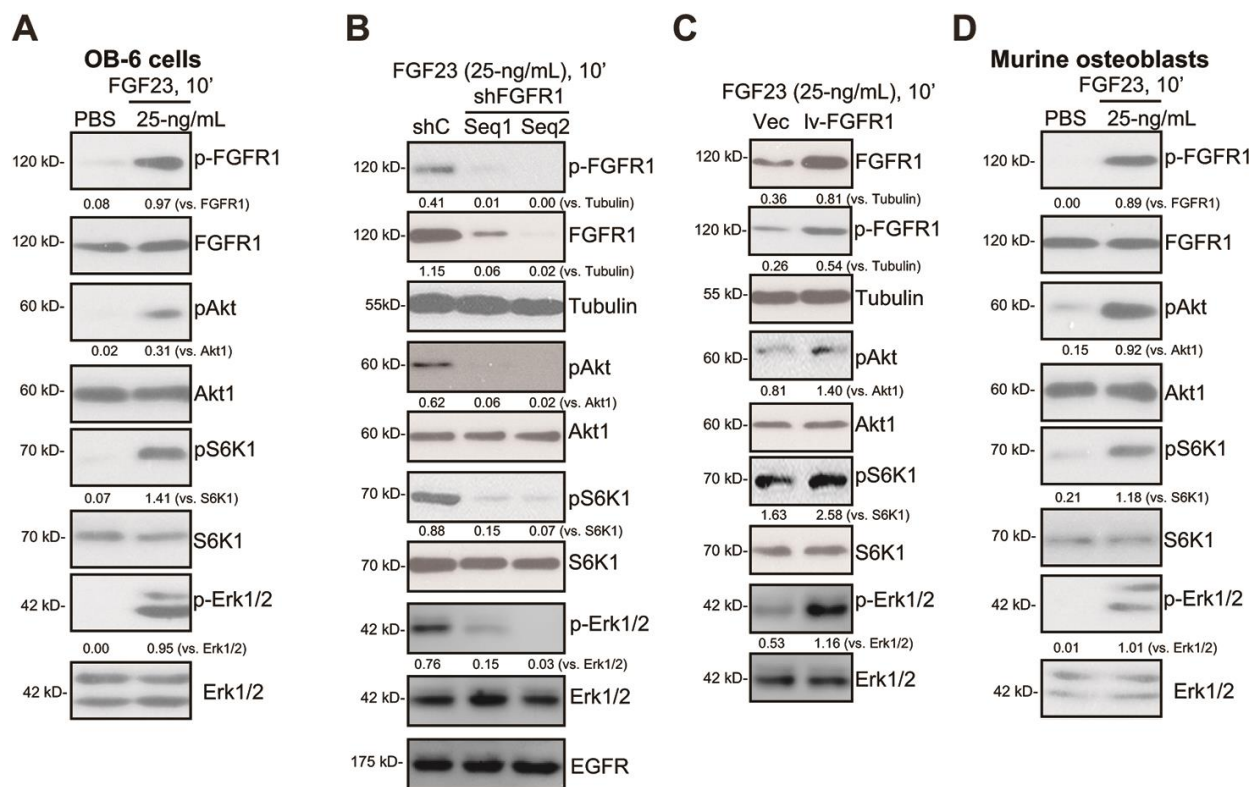

**Figure 1. FGF23 activates FGFR1-Akt-S6K1 and Erk1/2 signalings in osteoblasts.** The differentiated OB-6 human osteoblastic cells (A) or the primary murine osteoblasts (D) were treated with FGF23 (25 ng/mL) or PBS (the vehicle control) for 10 min, total cell lysates were collected, with the expression of listed proteins tested by Western blotting (A and D). Stable OB-6 cells, with the applied FGFR1 shRNA ("shFGFR1-Seq1/2", two non-overlapping sequences), the scramble control shRNA ("shC"), the lentiviral FGFR1-expressing construct ("lv-FGFR1"), or the empty vector ("Vec"), were treated with FGF23 (25 ng/mL) for 10 min, expression of listed proteins in total cell lysates were tested (B and C). For Western blotting assays, the same set of lysate samples were run in sister gels to test different proteins (same for all Figures). The exact same amount of protein lysates, 40  $\mu$ g lysates per lane, were loaded in each lane (same for all Figures). The listed proteins were quantified and normalized to the loading controls (same for all Figures). Each experiment was repeated three times and similar results were obtained.

fluorescence accumulation, Figure 4C). Importantly, FGF23 pretreatment largely attenuated DEX-induced oxidative injury in OB-6 cells (Figure 4A–4C).

In the primary murine osteoblasts, FGF23 exerted a similar antioxidant activity, inhibiting DEX-induced superoxide accumulation (Figure 4D), lipid peroxidation (Figure 4E) and mitochondrial depolarization (Figure 4F). FGF23 treatment alone did not alter oxidative levels in the osteoblasts (Figure 4A–4F). These results clearly

show that FGF23 inhibited DEX-induced oxidative stress in osteoblasts.

### FGF23 activates Nrf2 signaling in osteoblasts

Studies have shown that forced activation of Akt in osteoblasts could induce Nrf2 cascade activation, inhibiting DEX-induced oxidative injury [10, 39]. Thus, we tested the potential effect of FGF23 on Nrf2 signaling. Western blotting assay results, Figure 5A,

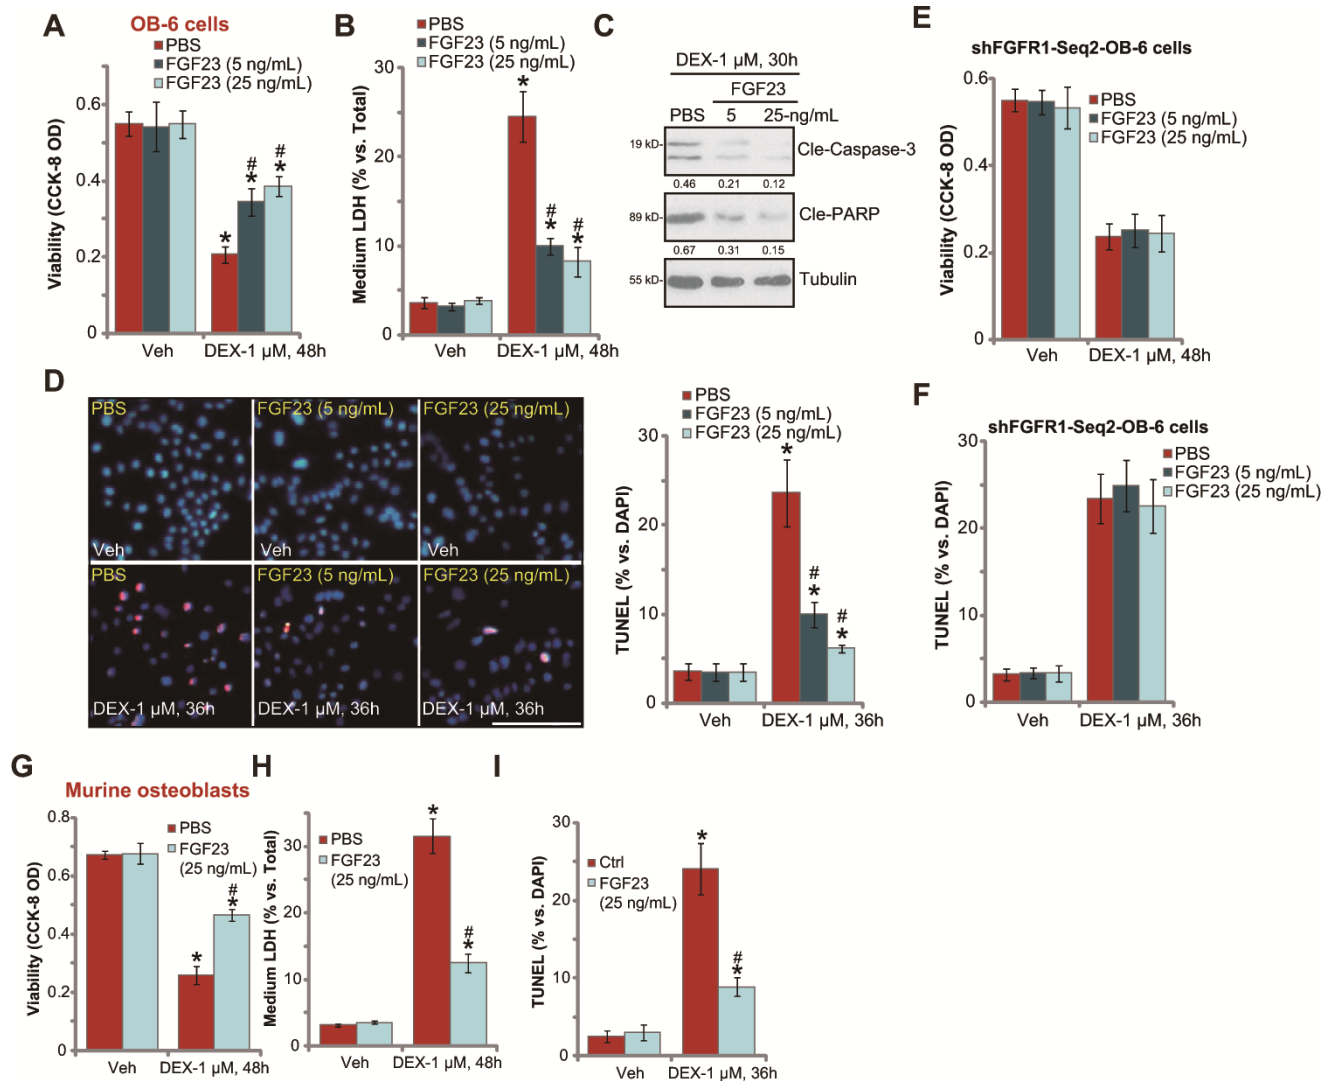

**Figure 2. FGF23 protects osteoblasts from DEX-induced cell death and apoptosis.** The differentiated OB-6 human osteoblastic cells (A–D) or the primary murine osteoblasts (G–I) were pretreated with applied concentration of FGF23 (5 or 25 ng/mL) or vehicle control (PBS) for 2h, followed by dexamethasone (DEX, 1  $\mu$ M) stimulation, cells were further cultured for the indicated time periods, cell viability and cell death were tested by CCK-8 (A and G) or medium LDH release (B and H) assays respectively; expression of the listed apoptosis-associated proteins was shown (C), with cell apoptosis tested by nuclear TUNEL staining (D and I). Stable OB-6 cells with the applied FGFR1 shRNA (“shFGFR1-Seq2”) were pretreated with FGF23 (5 or 25 ng/mL) or PBS for 2h, followed by DEX (1  $\mu$ M) stimulation, cells were further cultured for 48h, with cell viability (E) and apoptosis (F) tested similarly. Data were mean  $\pm$  standard deviation (SD, n=5). “Veh” stands for vehicle control for DEX. \* p<0.05 vs. “Veh” cells with PBS pretreatment. # p<0.05 vs. DEX-treated cells with PBS pretreatment. Each experiment was repeated three times and similar results were obtained. Bar=100  $\mu$ m (D).

demonstrated that Nrf2 protein levels were significantly elevated in FGF23-treated OB-6 cells. The mRNA expression of Nrf2-dependent genes, including *HO1*, *NQO1* and *GCLC*, was significantly increased following FGF23 treatment in OB-6 cells, with *Nrf2* mRNA levels unchanged (Figure 5B). HO1 and NQO1 protein levels were increased as well (Figure 5A). Additionally, the NQO1 activity was enhanced in FGF23-treated in OB-6 cells (Figure 5C). These results indicate that FGF23 activated Nrf2 signaling cascade, leading to stabilization of Nrf2 protein, expression of Nrf2-pathway genes and an increase of NQO1 activity in OB-6 cells.

Importantly, FGF23-induced mRNA expression of *HO1* and *NQO1* was almost completely blocked by FGFR1

shRNA (Seq-2, Figure 5D and 5E). LY294002 or Akt1 knockout (see Figure 3) abolished *HO1-NQO1* mRNA expression in FGF23-treated OB-6 cells (Figure 5D and 5E). On the contrary, *HO1* and *NQO1* mRNA levels were significantly increased in ca-Akt1-expressed OB-6 cells (Figure 5F). These results indicate that FGFR1-Akt activation is required FGF23-induced Nrf2 cascade activation.

In the primary murine osteoblasts FGF23 treatment induced Nrf2 protein stabilization (Figure 5G), increased mRNA expression of Nrf2-dependent genes (*HO1*, *NQO1* and *GCLC*) (Figure 5G and 5H), as well as NQO1 activity (Figure 5I). Taken together, these results show that FGF23 activated Nrf2 signaling in osteoblasts.

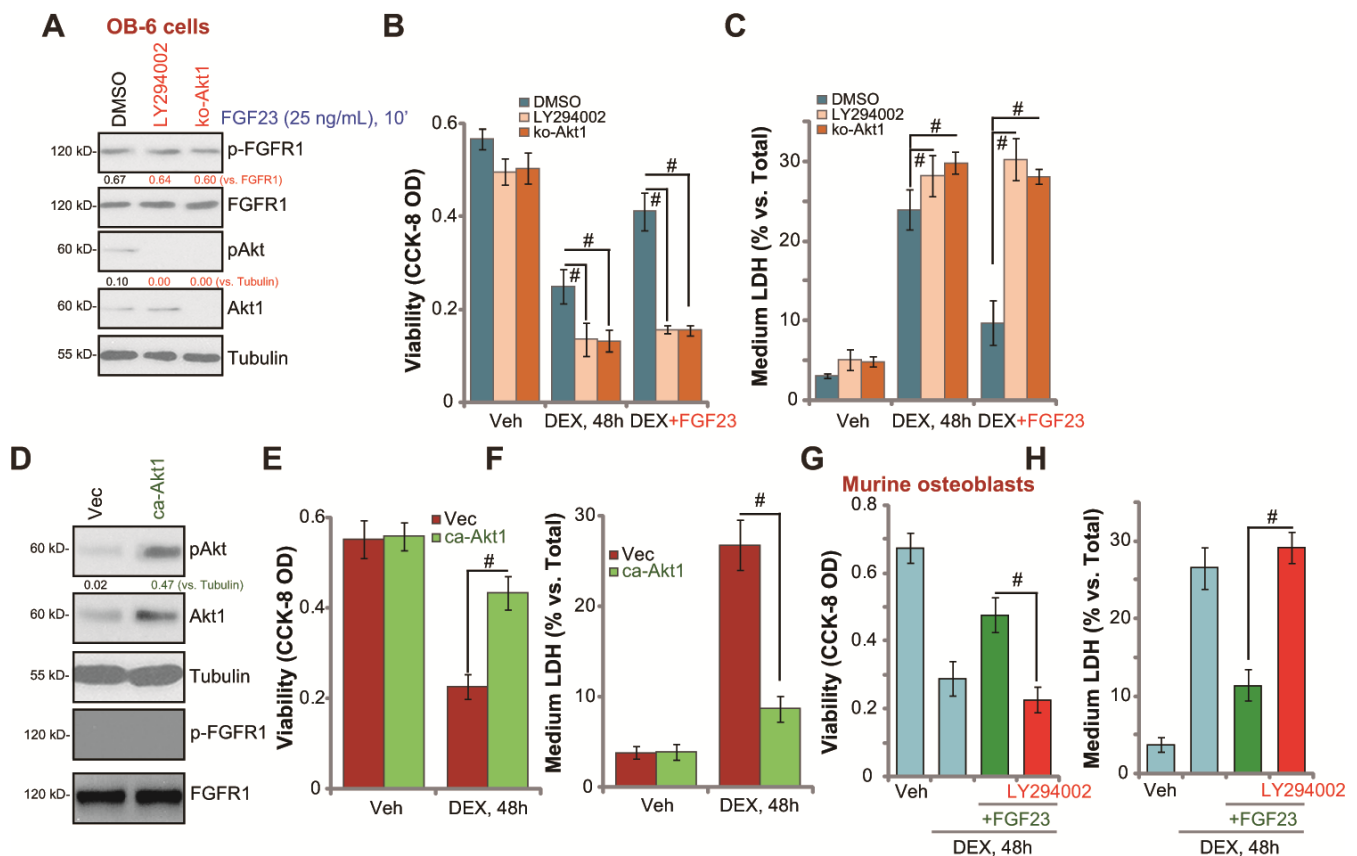

**Figure 3. Akt activation mediates FGF23-induced osteoblast cytoprotection against DEX.** The control OB-6 osteoblastic cells, pre-treated with LY294002 (500 nM, 30 min pretreatment) or the vehicle control (0.1% DMSO), as well as the stable OB-6 cells with the CRISPR/Cas9-Akt1-KO construct (“ko-Akt1”), were treated with FGF23 (25 ng/mL), after 10 min expression of the listed proteins in total cell lysates were shown (A). Alternatively two hours after the FGF23 treatment, cells were treated with dexamethasone (DEX, 1  $\mu$ M) or the vehicle control (“Veh”), cell viability and cell death were tested by CCK-8 (B) or medium LDH release (C) assays, respectively. The stable OB-6 cells with the constitutively-active Akt1 construct (caAkt1) or the empty vector (“Vec”) were subjected to Western blotting assays to test listed proteins (D). Cells were treated with DEX (1  $\mu$ M) or the vehicle control (“Veh”), after 48h cell viability (E) and cell death (F) were tested. The primary murine osteoblasts were pretreated with LY294002 (500 nM, 30 min pretreatment), followed by FGF23 (25 ng/mL) treatment for 2h, cells were further stimulated with DEX (1  $\mu$ M) for 48h, cell viability (G) and death (H) were tested. Data were mean  $\pm$  standard deviation (SD, n=5). # p<0.05. Each experiment was repeated three times and similar results were obtained.

## Nrf2 silencing or KO abolishes FGF23-induced osteoblast cytoprotection against DEX

To test whether Nrf2 cascade is important for FGF23-induced osteoblast cytoprotection against DEX, the Nrf2 shRNA lentiviral particles (from Dr. Xu [40]) were utilized, causing potent Nrf2 knockdown in FGF23-treated OB-6 cells (Figure 6A). Furthermore, a CRISPR-Cas9 Nrf2-KO construct (from Dr. Xu [40]) was utilized to completely knockout Nrf2 (Figure 6A). Nrf2 shRNA or KO did not alter FGF23-induced Akt activation (Figure 6A). FGF23-induced mRNA expression of Nrf2-dependent genes, *HO1*, *NQO1* and *GCLC*, was blocked by Nrf2 shRNA or KO (Figure 6B). Significantly, in Nrf2-silenced or Nrf2-KO OB-6 cells, FGF23 was unable to inhibit DEX-induced viability reduction (Figure 6C) and cell death (Figure 6D). Therefore, FGF23-induced

osteoblast cytoprotection against DEX was abolished with Nrf2 silencing or KO.

Keap1 depletion should induce Nrf2 cascade activation and mimic FGF23-induced osteoblastic cytoprotection. Therefore, a lentiviral CRISPR/Cas9-Keap1-KO construct was transduced to OB-6 cells, and stable cells established with puromycin selection (“ko-Keap1” cells). CRISPR/Cas9-induced Keap1 depletion (Figure 6E) resulted in significant Nrf2 protein elevation (Figure 6E), suggesting Nrf2 cascade activation. DEX-induced viability reduction (Figure 6F) and cell death (Figure 6G) were largely inhibited in ko-Keap1 OB-6 cells. Importantly, in ko-Keap1 OB-6 cells adding FGF23 failed to further increase Nrf2 protein accumulation (Figure 6E), nor it can offer additional osteoblast cytoprotection against DEX (Figure 6F and 6G).

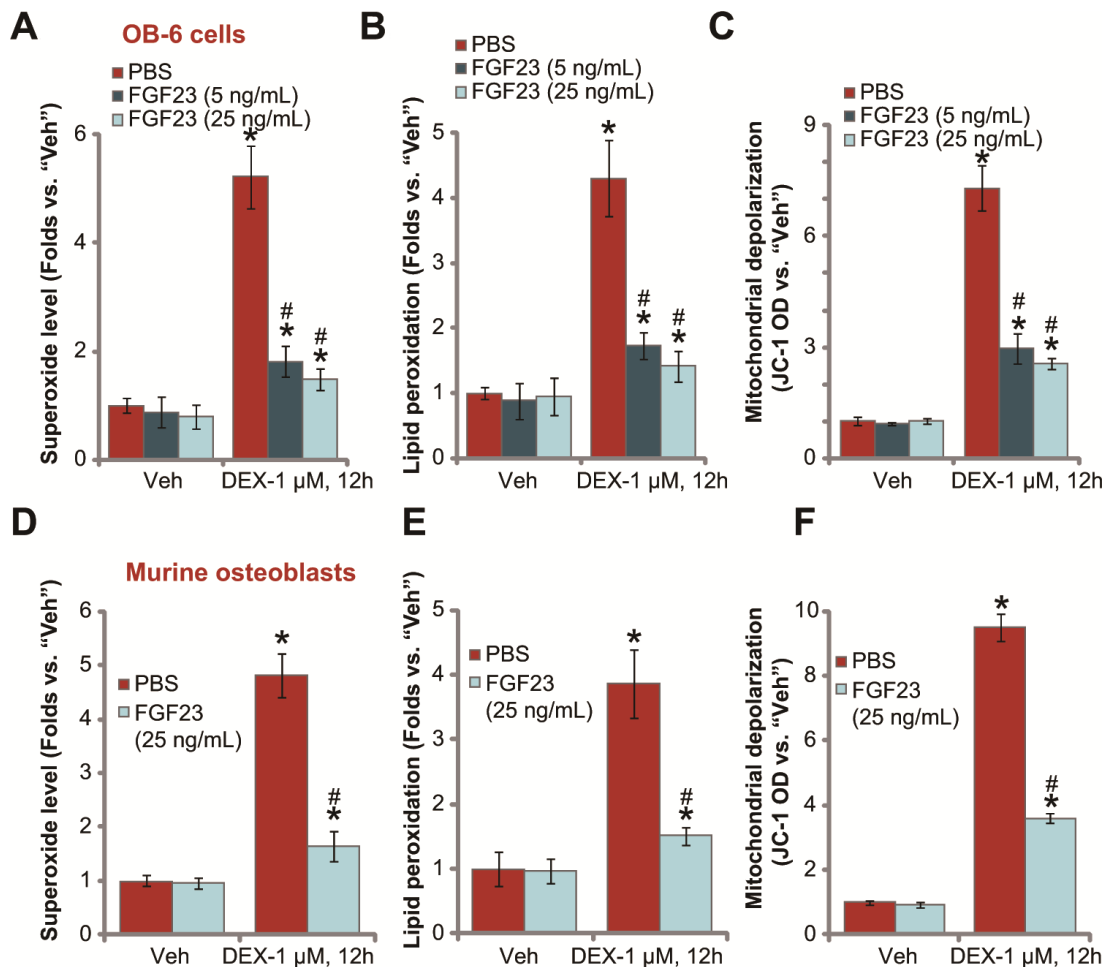

**Figure 4. FGF23 inhibits DEX-induced oxidative stress in osteoblasts.** OB-6 osteoblastic cells (A–C) or the primary murine osteoblasts (D–F) were pretreated with applied concentration of FGF23 (5 or 25 ng/mL) or vehicle control (PBS) for 2h, followed by dexamethasone (DEX, 1 μM) stimulation, cells were further cultured for additional 12h, superoxide contents (A and D), lipid peroxidation intensity (B and E) and mitochondrial depolarization (JC-1 green fluorescence accumulation, C and F) were tested, with results normalized. Data were mean ± standard deviation (SD, n=5). “Veh” stands for vehicle control for DEX. \* p<0.05 vs. “Veh” cells with PBS pretreatment. # p<0.05 vs. DEX-treated cells with PBS pretreatment. Each experiment was repeated three times and similar results were obtained.

These studies further support that Nrf2 cascade activation is required for FGF23-induced osteoblast cytoprotection.

## DISCUSSION

Xiao et al., have shown that FGF23 could activate FGFR1-Akt signaling without full length  $\alpha$ -Klotho [41].

The results of this study suggest that the functional FGFR1 is expressed in OB-6 osteoblastic cells and primary murine osteoblasts. FGF23 treatment *in vitro* induced phosphorylation of FGFR1 and its downstream Akt-S6K1 in OB-6 cells and murine osteoblasts. FGFR1 silencing in OB-6 cells, by targeted shRNAs, largely inhibited FGF23-induced Akt-S6K1 phosphorylation, but augmented with ectopic overexpression of FGFR1.

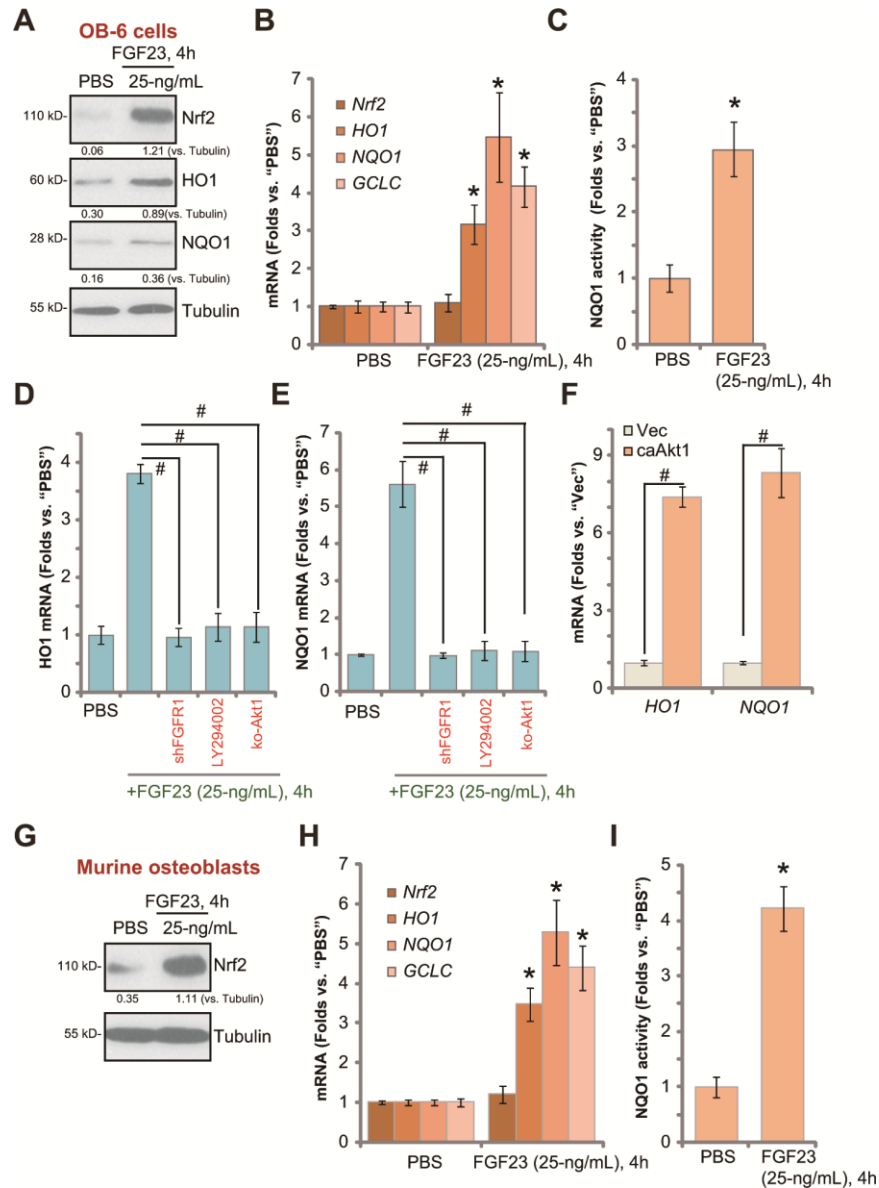

**Figure 5. FGF23 activates Nrf2 signaling in osteoblasts.** OB-6 osteoblastic cells (A–C) or the primary murine osteoblasts (G–I) were treated with FGF23 (25 ng/mL) for 4h, expression of listed genes in total cell lysates was tested by Western blotting and qPCR assays (A, B, G and H), with relative NQO1 activity tested as well (C and I). The control OB-6 cells, pre-treated with LY294002 (500 nM, 30 min pretreatment), as well as the stable OB-6 cells with the lentiviral FGFR1 shRNA (“shFGFR1”) or the CRISPR/Cas9-Akt1-KO construct (“ko-Akt1”), were treated with FGF23 (25 ng/mL) for 4h, expression of *HO1* and *NQO1* mRNA was shown (D and E). The relative *HO1* and *NQO1* mRNA expression in stable OB-6 cells with the constitutively-active Akt1 construct (caAkt1) or the empty vector (“Vec”) was tested (F). Data are presented as the mean  $\pm$  standard deviation (n=5). \* p<0.05 vs. PBS treatment. #p<0.05. Each experiment was repeated three times and similar results were obtained.

Importantly, FGF23-induced osteoblast cytoprotection against DEX is mediated by FGFR1-Akt signaling. With FGFR1 silencing (by shRNA), Akt inhibition (LY294002) or Akt1 KO (by CRISPR/Cas9d) FGF23 was ineffective against DEX-induced cell death and apoptosis. Conversely, forced Akt activation, by caAkt1, mimicked FGF23's action and inhibited DEX-induced cytotoxicity in osteoblasts. These results suggest that FGF23 activated FGFR1-Akt signaling to protect osteoblasts from DEX-induced cell death and apoptosis.

DEX treatment in cultured osteoblastic cells/osteoblasts shall provoke significant ROS production and oxidative injury, which is responsible for subsequent cell death and apoptosis. Contrarily, ROS scavengers or oxidative stress inhibition could protect osteoblastic cells/osteoblasts from DEX-induced cell death [39, 42, 43]. Our group and

others have indicated that forced activation of Nrf2 cascade, using genetic or pharmacological strategies, can efficiently protect osteoblastic cells/osteoblasts from DEX [9, 10, 37–39, 44]. Li et al., found that a novel Akt activator SC79 activated Akt-dependent Nrf2 signaling to protect osteoblastic cells from DEX [39]. Through activating Nrf2 signaling, an AMP-activated protein kinase activator compound 991 protected MC3T3-E1 osteoblastic cells and primary murine osteoblasts from DEX-induced cell death [37]. Similarly, Icariside II activated Akt-Nrf2 signaling cascade, thus protecting osteoblasts from DEX [10]. Nrf2 activation, via genetic strategies, also offered osteoblast cytoprotection against DEX [9, 38, 44].

However the uses of traditional Nrf2 activators are limited due to their high-concentrations and possible off-target toxicities. In the present study we showed that

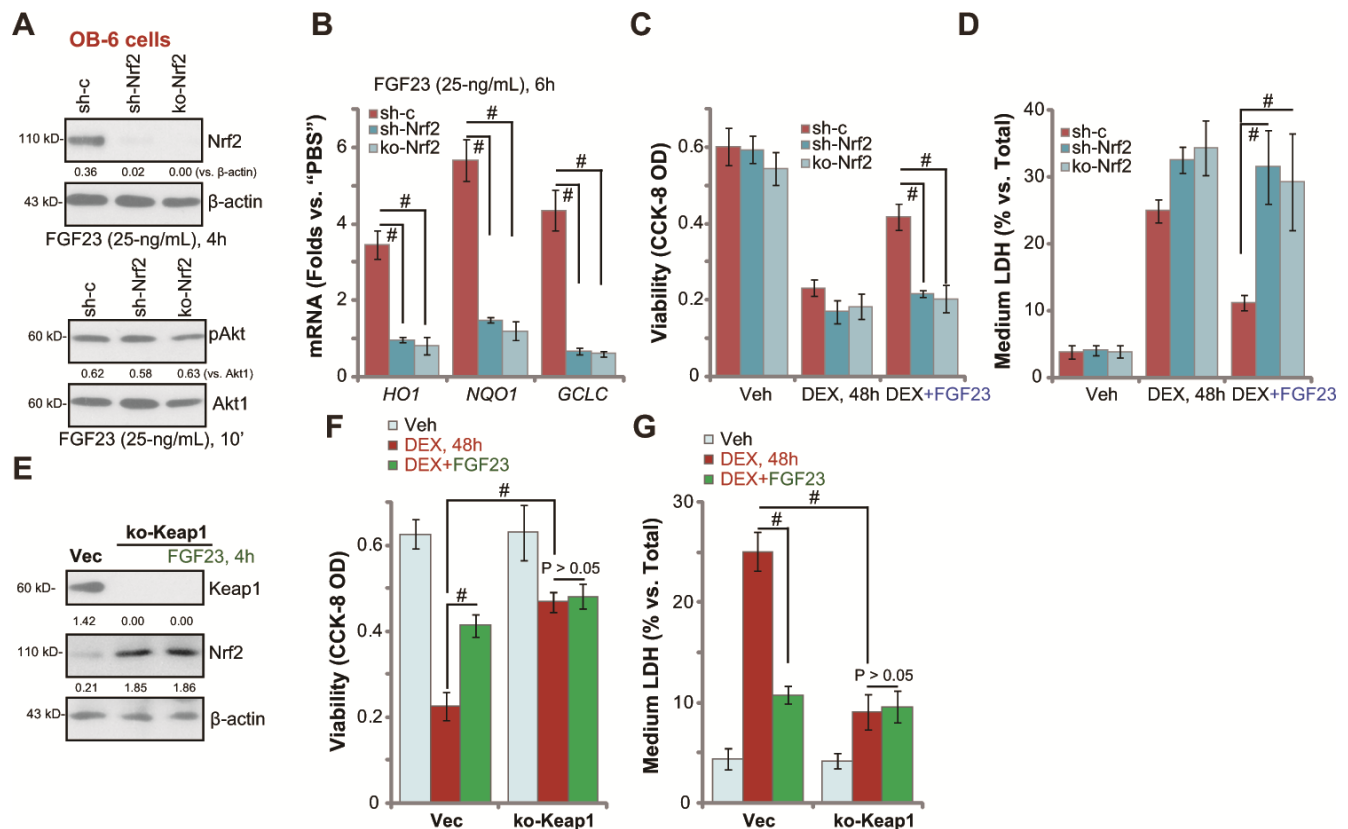

**Figure 6. Nrf2 silencing or KO abolishes FGF23-induced osteoblast cytoprotection against DEX.** Genetically-modified stable OB-6 cells with the lentiviral Nrf2 shRNA ("shNrf2") or the lentiCRISPR-GFP-Nrf2 KO construct ("ko-Nrf2"), as well as the parental control cells ("Ctrl") were treated with FGF23 (25 ng/mL) for applied time periods, expression of listed mRNAs and proteins was shown (A and B); Cells were pretreated for 2h with FGF23 (25 ng/mL), followed by dexamethasone (DEX, 1 μM) stimulation for 48h, cell viability and death were tested by CCK-8 (C) and medium LDH release (D) assays, respectively. Stable OB-6 cells with CRISPR/Cas9-Keap1-KO construct ("ko-Keap1") were treated with or without FGF23 (25 ng/mL) for 4h, control cells were transduced with empty vector ("Vec"), expression of listed proteins was shown (E). Alternatively, cells were pretreated for 2h with FGF23 (25 ng/mL), followed by dexamethasone (DEX, 1 μM) stimulation for 48h, cell viability (F) and death (G) were tested. Data are presented as the mean ± standard deviation (n=5). #p<0.05. The experiments in this figure were repeated three times, and similar results were obtained.



FGF23, at only ng/mL concentrations, induced significant Nrf2 cascade activation, causing Nrf2 protein stabilization, expression of Nrf2-pathway genes and an increase of NQO1 activity in OB-6 cells and primary murine osteoblasts. Functional studies showed that FGF23 efficiently attenuated DEX-induced oxidative injury in osteoblasts, suppressing superoxide accumulation, lipid peroxidation and mitochondrial depolarization. Therefore, Nrf2 signaling activation by FGF23 exerted anti-DEX osteoblast cytoprotection in osteoblasts.

Studies have implied that Akt (and its downstream mTOR) could be an important upstream molecule of Nrf2 signaling cascade. Lee et al., found that Nrf2 activation by sulforaphane was dependent on activation of the upstream PI3K-Akt [45]. Xu et al., have shown that PI3K-Akt activation is required for pyocyanin-induced Nrf2 activation [46]. Zhang et al., demonstrated that salvianolic acid A (Sal A)-activated Akt phosphorylated Nrf2 at Ser-40 in retinal pigmentation epithelial (RPE) cells, causing Nrf2 protein stabilization and activation [47]. Here we discovered that Akt activation mediated FGF23-induced Nrf2 signaling activation in osteoblasts. LY294002, the Akt inhibitor, or Akt1 knockout abolished FGF23-induced expression of *HO1* and *NQO1* in OB-6 cells. Contrarily, *HO1* and *NQO1* expression was significantly increased in OB-6 cells with caAkt1. These results indicated that FGF23-induced Akt activation severed as the upstream signaling for Nrf2 cascade activation in OB-6 cells.

## CONCLUSION

Collectively, these results suggest that FGF23 activates FGFR1-Akt signaling cascade to protect osteoblasts from DEX-induced oxidative injury and cell death.

## MATERIALS AND METHODS

### Chemicals and reagents

FGF23, DEX, LY294002, Trizol reagents, polybrene and puromycin were obtained from Sigma-Aldrich Chemicals Co. (St Louis, MO, USA). The cell culture reagents were provided by Gibco Co. (Shanghai, China). FGFR1 antibody (#3472) and all other antibodies were purchased from Cell Signaling Technology (Danvers, MA, USA).

### Cell culture

OB-6 human osteoblastic cells [33] and primary murine osteoblasts were differentiated and cultured as described previously [33, 48]. The protocols of this study were approved by IACUC and Ethics committee of Nanjing

Medical University. Osteoblast cell differentiation was induced by changing to media containing 10% FBS supplemented with BMP-4 (100 ng/mL).

### Western blotting

After treatment of cells, total cellular lysates (30-40 µg per lane) were separated by 10% SDS-PAGE gels, thereafter transferred onto polyvinylidene difluoride (PVDF) blots. Afterwards, the blots were blocked and subsequently incubated with the applied primary and secondary antibodies. Enhanced chemiluminescence (ECL) reagents (Pierce, Shanghai, China) were utilized to visualize the targeted bands (based on the molecular weights) using x-ray films [13-15]. An ImageJ software (from NIH) was utilized for data quantification.

### FGFR1 shRNA

From Shanghai Genechem Co. (Shanghai, China) a set of non-overlapping lentiviral shRNAs ("Seq1/Seq2") against human FGFR1 (Targeted sequences, Seq1: 5'-AGTGGCTTATTAATTCGGATA-3', and Seq2: 5'-GCTTGCCAATGGCGGACTCAA-3') were designed and synthesized. The shRNA lentivirus was added to cultured OB-6 cells for 48h. Puromycin (5 µg/mL, in complete medium) was then added to select stable cells for another 6 days. FGFR1 silencing was confirmed by Western blotting. Control OB-6 cells were infected with lentiviral scramble control shRNA ("sh-C", Santa Cruz Biotech, targeted sequence 5'-GCAAGCTGACCCGTAAGTTCAT-3').

### Forced FGFR1 overexpression

The full-length FGFR1 cDNA was synthesized by Shanghai Genechem Co. It was inserted into a GV369 construct (Shanghai Genechem Co., China). The construct and the lentivirus-packing plasmids (psPAX2 and pMD2.G, Shanghai Genechem Co., China) were co-transfected to HEK-293T cells, establishing FGFR1-expressing lentivirus ("lv-FGFR1"). The viruses were enriched, filtered, and added to cultured OB-6 cells (cultured in complete medium with polybrene) for 24h. Puromycin was added in the complete medium for 6 days to select stable cells. FGFR1 over-expression in the resulting stable cells was verified by Western blotting.

### CCK-8 viability

Cells were initially seeded into the 96-well plates at 4,000 cells per well. After the applied DEX treatment, a Cell Counting Kit-8 (CCK-8, Dojindo Laboratories, Kumamoto, Japan) assay kit [49] was utilized to examine the cell viability, with CCK-8 optic density (OD) values tested at 450 nm.

### Lactate dehydrogenase (LDH) assay

As described previously [13–15], following the applied DEX treatment cell death was tested by the LDH assay, using a commercial available two-step LDH assay kit (Takara, Tokyo, Japan). The medium LDH contents were always normalized to the total LDH contents.

### TUNEL (terminal deoxynucleotidyl transferase dUTP nick end labeling) staining

OB-6 cells or the primary murine osteoblasts were initially seeded into the 24-well tissue-culture plates (at  $1.2 \times 10^4$  cells per well). Following the applied DEX treatment, a TUNEL In Situ Cell Death Detection Kit (Roche Diagnostics Co., Shanghai, China) was applied to quantitatively test cell apoptosis [50]. Cells were co-stained with TUNEL and DAPI, visualized under a confocal fluorescent microscope (Leica, Shanghai, China). For each treatment at least 600 cells in six random views ( $1 \times 200$  magnification) were included to calculate TUNEL ratio (% vs. DAPI).

### Mitochondrial depolarization

In cells with mitochondrial depolarization the fluorescence dye JC-1 shall aggregate in the mitochondria, forming green monomers [51]. OB-6 cells or the primary murine osteoblasts were initially seeded into the 24-well tissue-culture plates. Following the applied DEX treatment, cells were stained with JC-1 (3.5  $\mu\text{g}/\text{mL}$ , Sigma), washed and tested under a fluorescence spectrofluorometer (F-7000, Hitachi, Japan) at test-wavelength of 545 nm (green).

### Quantitative real-time PCR (qPCR)

The total cellular RNA (extracted through the Trizol reagents) were reverse-transcribed (RT). qPCR was performed by the SYBR green kit under the ABI-7600 fast-PCR system (Applied Biosystems). The  $2^{-\Delta\Delta C_t}$  method was utilized to quantify expression of targeted mRNAs, using GAPDH as the internal control. All the primers for Nrf2 pathway genes were provided by Dr. Jiang at Nanjing Medical University [52–54].

### Superoxide detection

OB-6 cells or the primary murine osteoblasts were initially seeded into the 96-well tissue-culturing plates ( $4 \times 10^3$  cells per well). Following the applied DEX stimulation, a superoxide colorimetric assay kit (BioVision, Shanghai, China) was utilized to examine the cellular superoxide contents using the attached protocols, with the superoxide's absorbance tested at the 450 nm [52].

### Lipid peroxidation

As reported previously [52] OB-6 cells or the primary murine osteoblasts were seeded into six-well plates ( $1 \times 10^5$  cells per well). Following the applied DEX stimulation, the lipid peroxidation assay kit (Abcam, Shanghai, China) was utilized to examine and quantify cellular lipid peroxidation levels, tested by the thiobarbituric acid reactive (TBAR) concentration using the described protocols [52, 55].

### NQO1 activity

Testing the relative NQO1 activity in osteoblastic cells or murine osteoblasts with or without DEX treatment was described previously, using menadione as the substrate [56]. NQO1 activity was always normalized to that of untreated control cells.

### Constitutively-active mutant Akt1

The recombinant adenovirus constitutively-active Akt1 (caAkt1, S473D) construct was provided by Dr. Zhang [36]. Ad-caAkt1 virus or the empty vector (Ad-GFP) virus was added to the cultured OB-6 cells. GFP sorting was performed to select stable cells. caAkt1 expression in the selected single stable cells was verified by Western blotting.

### Akt1 knockout

The lenti-CRISPR-GFP Akt1-KO construct was provided by Dr. Zhang at Soochow University [35]. OB-6 cells were cultured in six well plates, transfected with CRISPR/Cas9 Akt1-knockout construct. Stable cells were selected *via* GFP FACS sorting. Akt1 knockout (KO) in the single stable cells was verified by Western blotting.

### Nrf2 shRNA

The Nrf2 shRNA lentiviral particles (sc-37030-V, from Dr. Xu [40]) were added to OB-6 cells for 24h. Puromycin (5.0  $\mu\text{g}/\text{mL}$ ) was added to select the stable cells (for 6 days), with 95% Nrf2 knockdown efficiency reached.

### Nrf2 knockout

The lenti-CRISPR-GFP-Nrf2 knockout (KO) construct (from Dr. Xu [40]) was transfected to OB-6 cells via the Lipofectamine 2000 reagents (Thermo-Fisher Invitrogen, Shanghai, China). FACS-mediated selection of GFP-positive OB-6 cells were performed, and the monoclonal stable cells cultured for eight consecutive days. Nrf2 KO was verified by qPCR and Western blotting assays.

## Keap1 knockout

The lentivirus with Keap1 CRISPR/Cas9 KO plasmid was provided by Dr. Liu at Jiangsu University [57], added to cultured OB-6 cells in polybrene medium. After 48h, cells were cultured in puromycin (2.0 µg/mL)-containing medium to establish the monoclonal stable cells, where Keap1 KO was verified by Western blotting.

## Statistical analysis

Experiments were repeated at least three times throughout the study. Quantitative data were expressed as mean ± standard deviation (SD). Statistics were analyzed by two-way ANOVA using a Scheffe's f-test (SPSS 21.0). To test significance between two treatment groups, a two-tailed unpaired T test (Excel 2007) was utilized. p values < 0.05 were considered statistically significant.

## AUTHOR CONTRIBUTIONS

All authors carried out the experiments, participated in the design of the study and performed the statistical analysis, participated in its design and coordination and helped to draft the manuscript.

## CONFLICTS OF INTEREST

The authors have no conflicts of interest.

## FUNDING

This work is supported by the National Natural Science Foundation.

## REFERENCES

- Schäcke H, Döcke WD, Asadullah K. Mechanisms involved in the side effects of glucocorticoids. *Pharmacol Ther.* 2002; 96:23–43. [https://doi.org/10.1016/s0163-7258\(02\)00297-8](https://doi.org/10.1016/s0163-7258(02)00297-8) PMID:12441176
- Koo KH, Kim R, Kim YS, Ahn IO, Cho SH, Song HR, Park YS, Kim H, Wang GJ. Risk period for developing osteonecrosis of the femoral head in patients on steroid treatment. *Clin Rheumatol.* 2002; 21:299–303. <https://doi.org/10.1007/s100670200078> PMID:12189457
- den Uyl D, Bultink IE, Lems WF. Advances in glucocorticoid-induced osteoporosis. *Curr Rheumatol Rep.* 2011; 13:233–40. <https://doi.org/10.1007/s11926-011-0173-y> PMID:21365209
- Weinstein RS. Clinical practice. Glucocorticoid-induced bone disease. *N Engl J Med.* 2011; 365:62–70. <https://doi.org/10.1056/NEJMc1012926> PMID:21732837
- Kerachian MA, Séguin C, Harvey EJ. Glucocorticoids in osteonecrosis of the femoral head: a new understanding of the mechanisms of action. *J Steroid Biochem Mol Biol.* 2009; 114:121–28. <https://doi.org/10.1016/j.jsbmb.2009.02.007> PMID:19429441
- Li H, Qian W, Weng X, Wu Z, Li H, Zhuang Q, Feng B, Bian Y. Glucocorticoid receptor and sequential P53 activation by dexamethasone mediates apoptosis and cell cycle arrest of osteoblastic MC3T3-E1 cells. *PLoS One.* 2012; 7:e37030. <https://doi.org/10.1371/journal.pone.0037030> PMID:22719835
- Yun SI, Yoon HY, Jeong SY, Chung YS. Glucocorticoid induces apoptosis of osteoblast cells through the activation of glycogen synthase kinase 3beta. *J Bone Miner Metab.* 2009; 27:140–48. <https://doi.org/10.1007/s00774-008-0019-5> PMID:19066717
- Gohel A, McCarthy MB, Gronowicz G. Estrogen prevents glucocorticoid-induced apoptosis in osteoblasts in vivo and in vitro. *Endocrinology.* 1999; 140:5339–47. <https://doi.org/10.1210/endo.140.11.7135> PMID:10537165
- Zhao S, Mao L, Wang SG, Chen FL, Ji F, Fei HD. MicroRNA-200a activates Nrf2 signaling to protect osteoblasts from dexamethasone. *Oncotarget.* 2017; 8:104867–76. <https://doi.org/10.18632/oncotarget.20452> PMID:29285219
- Liu W, Mao L, Ji F, Chen F, Wang S, Xie Y. Icariside II activates EGFR-Akt-Nrf2 signaling and protects osteoblasts from dexamethasone. *Oncotarget.* 2017; 8:2594–603. <https://doi.org/10.18632/oncotarget.13732> PMID:27911877
- Guo S, Chen C, Ji F, Mao L, Xie Y. PP2A catalytic subunit silence by microRNA-429 activates AMPK and protects osteoblastic cells from dexamethasone. *Biochem Biophys Res Commun.* 2017; 487:660–65. <https://doi.org/10.1016/j.bbrc.2017.04.111> PMID:28438603
- Zhao S, Chen C, Wang S, Ji F, Xie Y. MHY1485 activates mTOR and protects osteoblasts from dexamethasone. *Biochem Biophys Res Commun.* 2016; 481:212–18. <https://doi.org/10.1016/j.bbrc.2016.10.104> PMID:27884298

13. Guo S, Xie Y, Fan JB, Ji F, Wang S, Fei H. A-melanocyte stimulating hormone attenuates dexamethasone-induced osteoblast damages through activating melanocortin receptor 4-SphK1 signaling. *Biochem Biophys Res Commun.* 2016; 469:281–87. <https://doi.org/10.1016/j.bbrc.2015.11.104> PMID:[26631960](https://pubmed.ncbi.nlm.nih.gov/26631960/)
14. Guo S, Mao L, Ji F, Wang S, Xie Y, Fei H, Wang XD. Activating AMP-activated protein kinase by an  $\alpha$ 1 selective activator compound 13 attenuates dexamethasone-induced osteoblast cell death. *Biochem Biophys Res Commun.* 2016; 471:545–52. <https://doi.org/10.1016/j.bbrc.2016.02.036> PMID:[26891866](https://pubmed.ncbi.nlm.nih.gov/26891866/)
15. Ji F, Mao L, Liu Y, Cao X, Xie Y, Wang S, Fei H. K6PC-5, a novel sphingosine kinase 1 (SphK1) activator, alleviates dexamethasone-induced damages to osteoblasts through activating SphK1-Akt signaling. *Biochem Biophys Res Commun.* 2015; 458:568–75. <https://doi.org/10.1016/j.bbrc.2015.02.007> PMID:[25680461](https://pubmed.ncbi.nlm.nih.gov/25680461/)
16. Martin A, David V, Quarles LD. Regulation and function of the FGF23/klotho endocrine pathways. *Physiol Rev.* 2012; 92:131–55. <https://doi.org/10.1152/physrev.00002.2011> PMID:[22298654](https://pubmed.ncbi.nlm.nih.gov/22298654/)
17. Goetz R, Nakada Y, Hu MC, Kurosu H, Wang L, Nakatani T, Shi M, Eliseenkova AV, Razzaque MS, Moe OW, Kuro-o M, Mohammadi M. Isolated c-terminal tail of FGF23 alleviates hypophosphatemia by inhibiting FGF23-FGFR-klotho complex formation. *Proc Natl Acad Sci USA.* 2010; 107:407–12. <https://doi.org/10.1073/pnas.0902006107> PMID:[19966287](https://pubmed.ncbi.nlm.nih.gov/19966287/)
18. Shimada T, Kakitani M, Yamazaki Y, Hasegawa H, Takeuchi Y, Fujita T, Fukumoto S, Tomizuka K, Yamashita T. Targeted ablation of Fgf23 demonstrates an essential physiological role of FGF23 in phosphate and vitamin D metabolism. *J Clin Invest.* 2004; 113:561–68. <https://doi.org/10.1172/JCI19081> PMID:[14966565](https://pubmed.ncbi.nlm.nih.gov/14966565/)
19. Edmonston D, Wolf M. FGF23 at the crossroads of phosphate, iron economy and erythropoiesis. *Nat Rev Nephrol.* 2020; 16:7–19. <https://doi.org/10.1038/s41581-019-0189-5> PMID:[31519999](https://pubmed.ncbi.nlm.nih.gov/31519999/)
20. Takashi Y, Fukumoto S. FGF23 beyond phosphotropic hormone. *Trends Endocrinol Metab.* 2018; 29:755–67. <https://doi.org/10.1016/j.tem.2018.08.006> PMID:[30217676](https://pubmed.ncbi.nlm.nih.gov/30217676/)
21. Masuyama R, Stockmans I, Torrekens S, Van Looveren R, Maes C, Carmeliet P, Bouillon R, Carmeliet G. Vitamin D receptor in chondrocytes promotes osteoclastogenesis and regulates FGF23 production in osteoblasts. *J Clin Invest.* 2006; 116:3150–59. <https://doi.org/10.1172/JCI29463> PMID:[17099775](https://pubmed.ncbi.nlm.nih.gov/17099775/)
22. Tang WJ, Wang LF, Xu XY, Zhou Y, Jin WF, Wang HF, Gao J. Autocrine/paracrine action of vitamin D on FGF23 expression in cultured rat osteoblasts. *Calcif Tissue Int.* 2010; 86:404–10. <https://doi.org/10.1007/s00223-010-9355-2> PMID:[20354682](https://pubmed.ncbi.nlm.nih.gov/20354682/)
23. Feng S, Wang J, Zhang Y, Creighton CJ, Ittmann M. FGF23 promotes prostate cancer progression. *Oncotarget.* 2015; 6:17291–301. <https://doi.org/10.18632/oncotarget.4174> PMID:[26019137](https://pubmed.ncbi.nlm.nih.gov/26019137/)
24. Ma Q, He X. Molecular basis of electrophilic and oxidative defense: promises and perils of Nrf2. *Pharmacol Rev.* 2012; 64:1055–81. <https://doi.org/10.1124/pr.110.004333> PMID:[22966037](https://pubmed.ncbi.nlm.nih.gov/22966037/)
25. Itoh K, Mimura J, Yamamoto M. Discovery of the negative regulator of Nrf2, Keap1: a historical overview. *Antioxid Redox Signal.* 2010; 13:1665–78. <https://doi.org/10.1089/ars.2010.3222> PMID:[20446768](https://pubmed.ncbi.nlm.nih.gov/20446768/)
26. Nguyen T, Nioi P, Pickett CB. The Nrf2-antioxidant response element signaling pathway and its activation by oxidative stress. *J Biol Chem.* 2009; 284:13291–95. <https://doi.org/10.1074/jbc.R900010200> PMID:[19182219](https://pubmed.ncbi.nlm.nih.gov/19182219/)
27. Li W, Kong AN. Molecular mechanisms of Nrf2-mediated antioxidant response. *Mol Carcinog.* 2009; 48:91–104. <https://doi.org/10.1002/mc.20465> PMID:[18618599](https://pubmed.ncbi.nlm.nih.gov/18618599/)
28. Suzuki T, Yamamoto M. Molecular basis of the Keap1-Nrf2 system. *Free Radic Biol Med.* 2015; 88:93–100. <https://doi.org/10.1016/j.freeradbiomed.2015.06.006> PMID:[26117331](https://pubmed.ncbi.nlm.nih.gov/26117331/)
29. Wardyn JD, Ponsford AH, Sanderson CM. Dissecting molecular cross-talk between Nrf2 and NF- $\kappa$ B response pathways. *Biochem Soc Trans.* 2015; 43:621–26. <https://doi.org/10.1042/BST20150014> PMID:[26551702](https://pubmed.ncbi.nlm.nih.gov/26551702/)
30. Kundu JK, Surh YJ. Nrf2-Keap1 signaling as a potential target for chemoprevention of inflammation-associated carcinogenesis. *Pharm Res.* 2010; 27:999–1013. <https://doi.org/10.1007/s11095-010-0096-8> PMID:[20354764](https://pubmed.ncbi.nlm.nih.gov/20354764/)
31. Fan JB, Liu W, Zhu XH, Cui SY, Cui ZM, Zhao JN. microRNA-7 inhibition protects human osteoblasts

- from dexamethasone via activation of epidermal growth factor receptor signaling. *Mol Cell Biochem.* 2019; 460:113–21.  
<https://doi.org/10.1007/s11010-019-03575-y>  
 PMID:31313024
32. Zhang XY, Shan HJ, Zhang P, She C, Zhou XZ. LncRNA EPIC1 protects human osteoblasts from dexamethasone-induced cell death. *Biochem Biophys Res Commun.* 2018; 503:2255–62.  
<https://doi.org/10.1016/j.bbrc.2018.06.146>  
 PMID:29959919
  33. Ding H, Wang T, Xu D, Cha B, Liu J, Li Y. Dexamethasone-induced apoptosis of osteocytic and osteoblastic cells is mediated by TAK1 activation. *Biochem Biophys Res Commun.* 2015; 460:157–63.  
<https://doi.org/10.1016/j.bbrc.2015.02.161>  
 PMID:25753204
  34. Song G, Ouyang G, Bao S. The activation of Akt/PKB signaling pathway and cell survival. *J Cell Mol Med.* 2005; 9:59–71.  
<https://doi.org/10.1111/j.1582-4934.2005.tb00337.x>  
 PMID:15784165
  35. Zhu JL, Wu YY, Wu D, Luo WF, Zhang ZQ, Liu CF. SC79, a novel Akt activator, protects dopaminergic neuronal cells from MPP<sup>+</sup> and rotenone. *Mol Cell Biochem.* 2019; 461:81–89.  
<https://doi.org/10.1007/s11010-019-03592-x>  
 PMID:31342299
  36. Zhang D, Xia H, Zhang W, Fang B. The anti-ovarian cancer activity by WYE-132, a mTORC1/2 dual inhibitor. *Tumour Biol.* 2016; 37:1327–36.  
<https://doi.org/10.1007/s13277-015-3922-0>  
 PMID:26293898
  37. Xu YY, Chen FL, Ji F, Fei HD, Xie Y, Wang SG. Activation of AMP-activated protein kinase by compound 991 protects osteoblasts from dexamethasone. *Biochem Biophys Res Commun.* 2018; 495:1014–21.  
<https://doi.org/10.1016/j.bbrc.2017.11.132>  
 PMID:29175330
  38. Liu G, Chen FL, Ji F, Fei HD, Xie Y, Wang SG. microRNA-19a protects osteoblasts from dexamethasone via targeting TSC1. *Oncotarget.* 2017; 9:2017–27.  
<https://doi.org/10.18632/oncotarget.23326>  
 PMID:29416749
  39. Li ST, Chen NN, Qiao YB, Zhu WL, Ruan JW, Zhou XZ. SC79 rescues osteoblasts from dexamethasone through activating Akt-Nrf2 signaling. *Biochem Biophys Res Commun.* 2016; 479:54–60.  
<https://doi.org/10.1016/j.bbrc.2016.09.027>  
 PMID:27614310
  40. Tang C, Tan S, Zhang Y, Dong L, Xu Y. Activation of Keap1-Nrf2 signaling by 4-octyl itaconate protects human umbilical vein endothelial cells from high glucose. *Biochem Biophys Res Commun.* 2019; 508:921–27.  
<https://doi.org/10.1016/j.bbrc.2018.12.032>  
 PMID:30545629
  41. Xiao Z, King G, Mancarella S, Munkhsaikhan U, Cao L, Cai C, Quarles LD. FGF23 expression is stimulated in transgenic  $\alpha$ -klotho longevity mouse model. *JCI Insight.* 2019; 4:e132820.  
<https://doi.org/10.1172/jci.insight.132820>  
 PMID:31801907
  42. Fan JB, Ruan JW, Liu W, Zhu LQ, Zhu XH, Yi H, Cui SY, Zhao JN, Cui ZM. miR-135b expression downregulates Ppm1e to activate AMPK signaling and protect osteoblastic cells from dexamethasone. *Oncotarget.* 2016; 7:70613–22.  
<https://doi.org/10.18632/oncotarget.12138>  
 PMID:27661114
  43. Inkiewicz-Stepniak I, Radomski MW, Wozniak M. Fisetin prevents fluoride- and dexamethasone-induced oxidative damage in osteoblast and hippocampal cells. *Food Chem Toxicol.* 2012; 50:583–89.  
<https://doi.org/10.1016/j.fct.2011.12.015>  
 PMID:22198064
  44. Fan JB, Zhang Y, Liu W, Zhu XH, Xu DW, Zhao JN, Cui ZM. Long non-coding RNA MALAT1 protects human osteoblasts from dexamethasone-induced injury via activation of PPM1E-AMPK signaling. *Cell Physiol Biochem.* 2018; 51:31–45.  
<https://doi.org/10.1159/000495159>  
 PMID:30439702
  45. Lee YJ, Jeong HY, Kim YB, Lee YJ, Won SY, Shim JH, Cho MK, Nam HS, Lee SH. Reactive oxygen species and PI3K/Akt signaling play key roles in the induction of Nrf2-driven heme oxygenase-1 expression in sulforaphane-treated human mesothelioma MSTO-211H cells. *Food Chem Toxicol.* 2012; 50:116–23.  
<https://doi.org/10.1016/j.fct.2011.10.035>  
 PMID:22019695
  46. Xu Y, Duan C, Kuang Z, Hao Y, Jeffries JL, Lau GW. *Pseudomonas aeruginosa* pyocyanin activates NRF2-ARE-mediated transcriptional response via the ROS-EGFR-PI3K-AKT/MEK-ERK MAP kinase signaling in pulmonary epithelial cells. *PLoS One.* 2013; 8:e72528.  
<https://doi.org/10.1371/journal.pone.0072528>  
 PMID:24015256
  47. Zhang H, Liu YY, Jiang Q, Li KR, Zhao YX, Cao C, Yao J. Salvianolic acid protects RPE cells against oxidative stress through activation of Nrf2/HO-1 signaling. *Free Radic Biol Med.* 2014; 69:219–28.  
<https://doi.org/10.1016/j.freeradbiomed.2014.01.025>  
 PMID:24486344

48. Xu Y, Li G, Du B, Zhang P, Xiao L, Sirois P, Li K. Hepcidin increases intracellular Ca<sup>2+</sup> of osteoblast hFOB1.19 through L-type Ca<sup>2+</sup> channels. *Regul Pept.* 2011; 172:58–61.  
<https://doi.org/10.1016/j.regpep.2011.08.009>  
PMID:[21911012](https://pubmed.ncbi.nlm.nih.gov/21911012/)
49. Sun J, Zheng J, Li Y, Yan M, Li P, Ma L. LncRNA EPIC1 downregulation mediates hydrogen peroxide-induced neuronal cell injury. *Aging (Albany NY).* 2019; 11:11463–73.  
<https://doi.org/10.18632/aging.102545>  
PMID:[31812951](https://pubmed.ncbi.nlm.nih.gov/31812951/)
50. Zhou LN, Li P, Cai S, Li G, Liu F. Ninjurin2 overexpression promotes glioma cell growth. *Aging (Albany NY).* 2019; 11:11136–47.  
<https://doi.org/10.18632/aging.102515>  
PMID:[31794427](https://pubmed.ncbi.nlm.nih.gov/31794427/)
51. Brooks MM, Neelam S, Fudala R, Gryczynski I, Cammarata PR. Lenticular mitoprotection. Part A: Monitoring mitochondrial depolarization with JC-1 and artifactual fluorescence by the glycogen synthase kinase-3 $\beta$  inhibitor, SB216763. *Mol Vis.* 2013; 19:1406–12.  
PMID:[23825920](https://pubmed.ncbi.nlm.nih.gov/23825920/)
52. Xu XZ, Tang Y, Cheng LB, Yao J, Jiang Q, Li KR, Zhen YF. Targeting Keap1 by miR-626 protects retinal pigment epithelium cells from oxidative injury by activating Nrf2 signaling. *Free Radic Biol Med.* 2019; 143:387–96.  
<https://doi.org/10.1016/j.freeradbiomed.2019.08.024>  
PMID:[31446056](https://pubmed.ncbi.nlm.nih.gov/31446056/)
53. Sun GL, Huang D, Li KR, Jiang Q. microRNA-4532 inhibition protects human lens epithelial cells from ultra-violet-induced oxidative injury via activating SIRT6-Nrf2 signaling. *Biochem Biophys Res Commun.* 2019; 514:777–84.  
<https://doi.org/10.1016/j.bbrc.2019.05.026>  
PMID:[31079921](https://pubmed.ncbi.nlm.nih.gov/31079921/)
54. Chen ZJ, Rong L, Huang D, Jiang Q. Targeting cullin 3 by miR-601 activates Nrf2 signaling to protect retinal pigment epithelium cells from hydrogen peroxide. *Biochem Biophys Res Commun.* 2019; 515:679–87.  
<https://doi.org/10.1016/j.bbrc.2019.05.171>  
PMID:[31178131](https://pubmed.ncbi.nlm.nih.gov/31178131/)
55. Liu WY, Liou SS, Hong TY, Liu IM. Protective effects of hesperidin (citrus flavonone) on high glucose induced oxidative stress and apoptosis in a cellular model for diabetic retinopathy. *Nutrients.* 2017; 9:1312.  
<https://doi.org/10.3390/nu9121312> PMID:[29207476](https://pubmed.ncbi.nlm.nih.gov/29207476/)
56. Mills EL, Ryan DG, Prag HA, Dikovskaya D, Menon D, Zaslona Z, Jedrychowski MP, Costa AS, Higgins M, Hams E, Szpyt J, Runtsch MC, King MS, et al. Itaconate is an anti-inflammatory metabolite that activates Nrf2 via alkylation of KEAP1. *Nature.* 2018; 556:113–17.  
<https://doi.org/10.1038/nature25986> PMID:[29590092](https://pubmed.ncbi.nlm.nih.gov/29590092/)
57. Liu H, Feng Y, Xu M, Yang J, Wang Z, Di G. Four-octyl itaconate activates Keap1-Nrf2 signaling to protect neuronal cells from hydrogen peroxide. *Cell Commun Signal.* 2018; 16:81.  
<https://doi.org/10.1186/s12964-018-0294-2>  
PMID:[30442144](https://pubmed.ncbi.nlm.nih.gov/30442144/)

## SUPPLEMENTARY MATERIALS

### Supplementary Figure

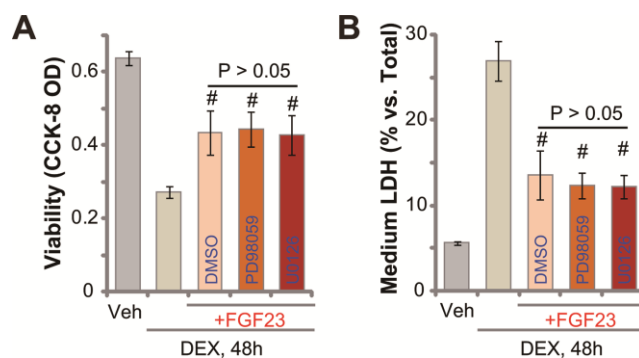

**Supplementary Figure 1.** OB-6 cells, pre-treated with PD98059 or U0126 (each at 5  $\mu$ M, 30 min pretreatment), were treated with FGF23 (25 ng/mL) for 1h, followed by DEX (1  $\mu$ M) or the vehicle control (“Veh”) treatment for 48h, cell viability (A) and cell death (B) were tested. Data were mean  $\pm$  standard deviation (SD, n=5). # p<0.05 vs. DEX only treatment. Each experiment was repeated three times and similar results were obtained.
